# Supplementary material
Source: PubMed Central journal article supplement (PMC4134963)
Supplement: NIHMS611401-supplement-1.pdf [file NIHMS611401-supplement-1.pdf]

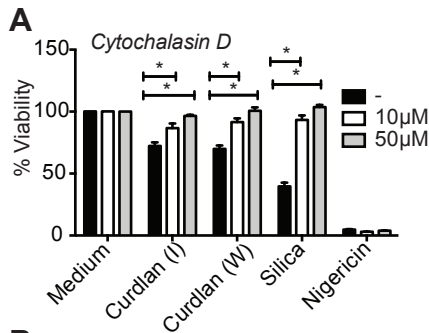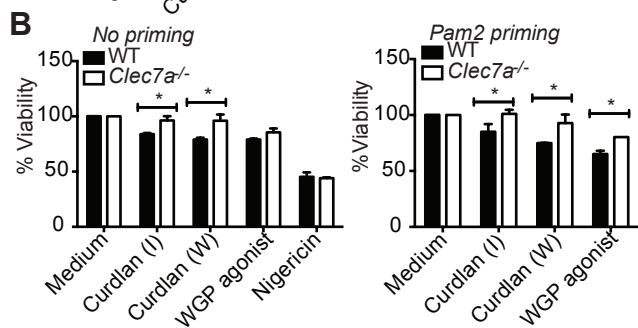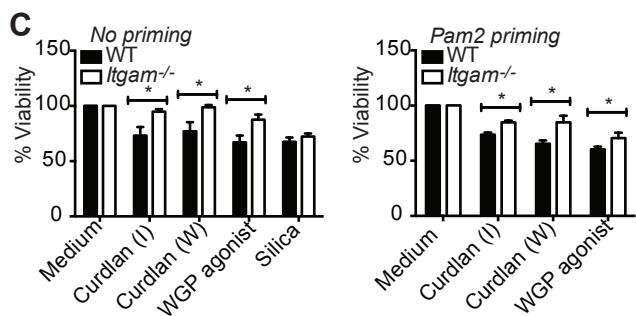

**Figure S1. Phagocytosis of  $\beta$ -glucans and the receptors dectin-1 and CR3 trigger  $\beta$ -glucan induced cell death.** Unprimed or Pam2CSK4 primed BMDC from C57BL/6 (A-C), *Clec7a*<sup>-/-</sup> (B) or *Itgam*<sup>-/-</sup> (C) mice were stimulated with curdlan (I or W), WGP agonist, silica for 6h or nigericin for 1h. Cell viability was assessed by cell titer-glo assay. In panel A, Pam2 primed cells were pretreated with the indicated concentrations of cytochalasin D prior to stimulating them with the indicated ligands. Statistical analysis was performed on results in all panels as described in the Materials and Methods section.

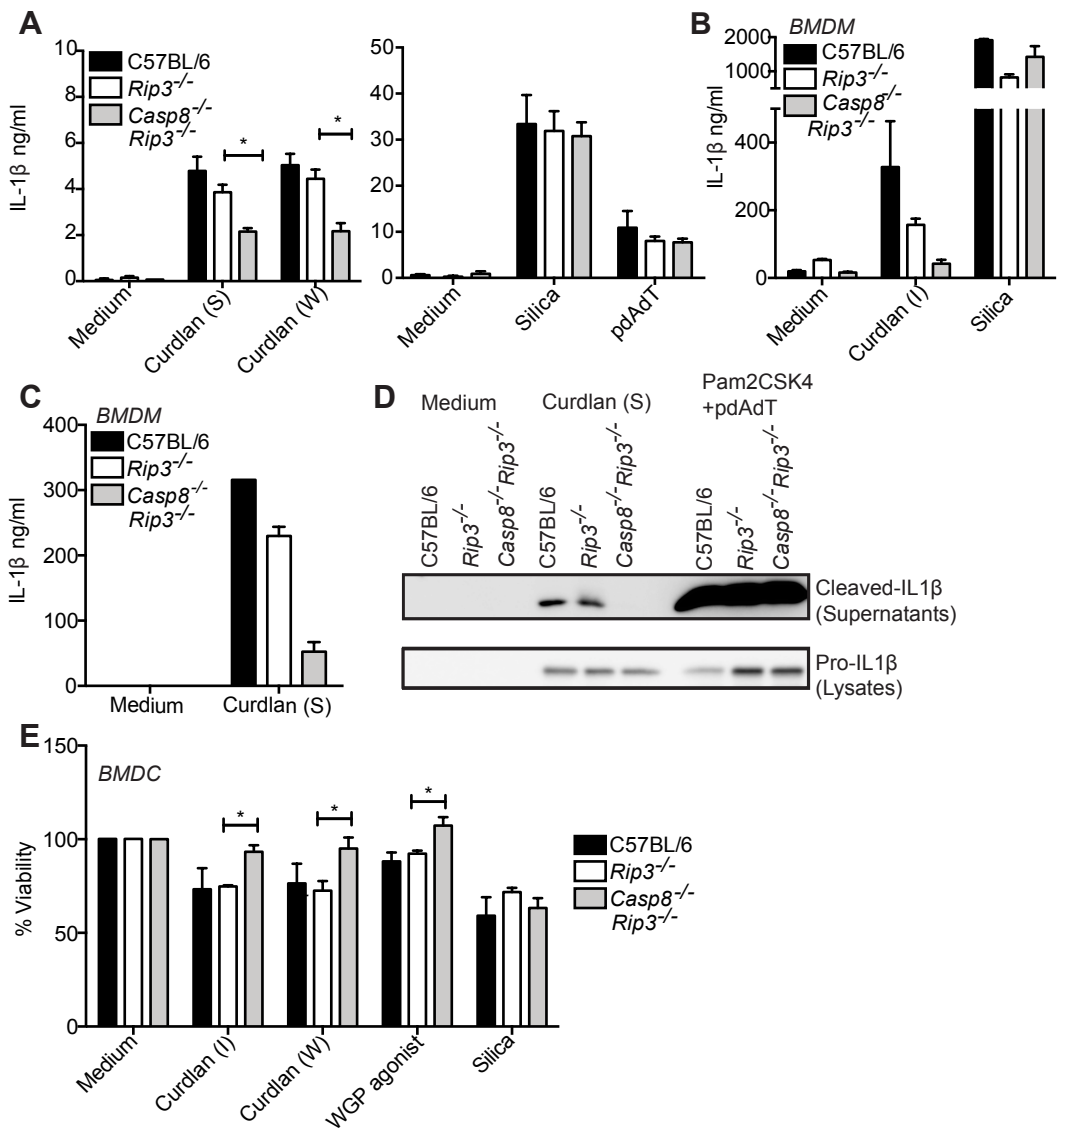

**Figure S2. Caspase-8 mediates IL-1 $\beta$  production and cell death in response to curdlan from different sources.** Pam2CSK4 primed (A-B, E) or unprimed (C-D) BMDM or BMDM from C57BL/6, *Rip3*<sup>-/-</sup>, *Casp8*<sup>-/-</sup> *Rip3*<sup>-/-</sup> mice were stimulated with curdlan (I,W or S) for 6h (BMDM) or 24h (BMDM) and silica or pdAdT for 6h. IL-1 $\beta$  release in the supernatants was measured by ELISA (A-C). Precipitated supernatants and cell lysates were probed for IL-1 $\beta$  (D). Cell viability was measured by cell-titer glo assay (E). Statistical analysis was performed on results in panels A and E as described in the Materials and Methods section.

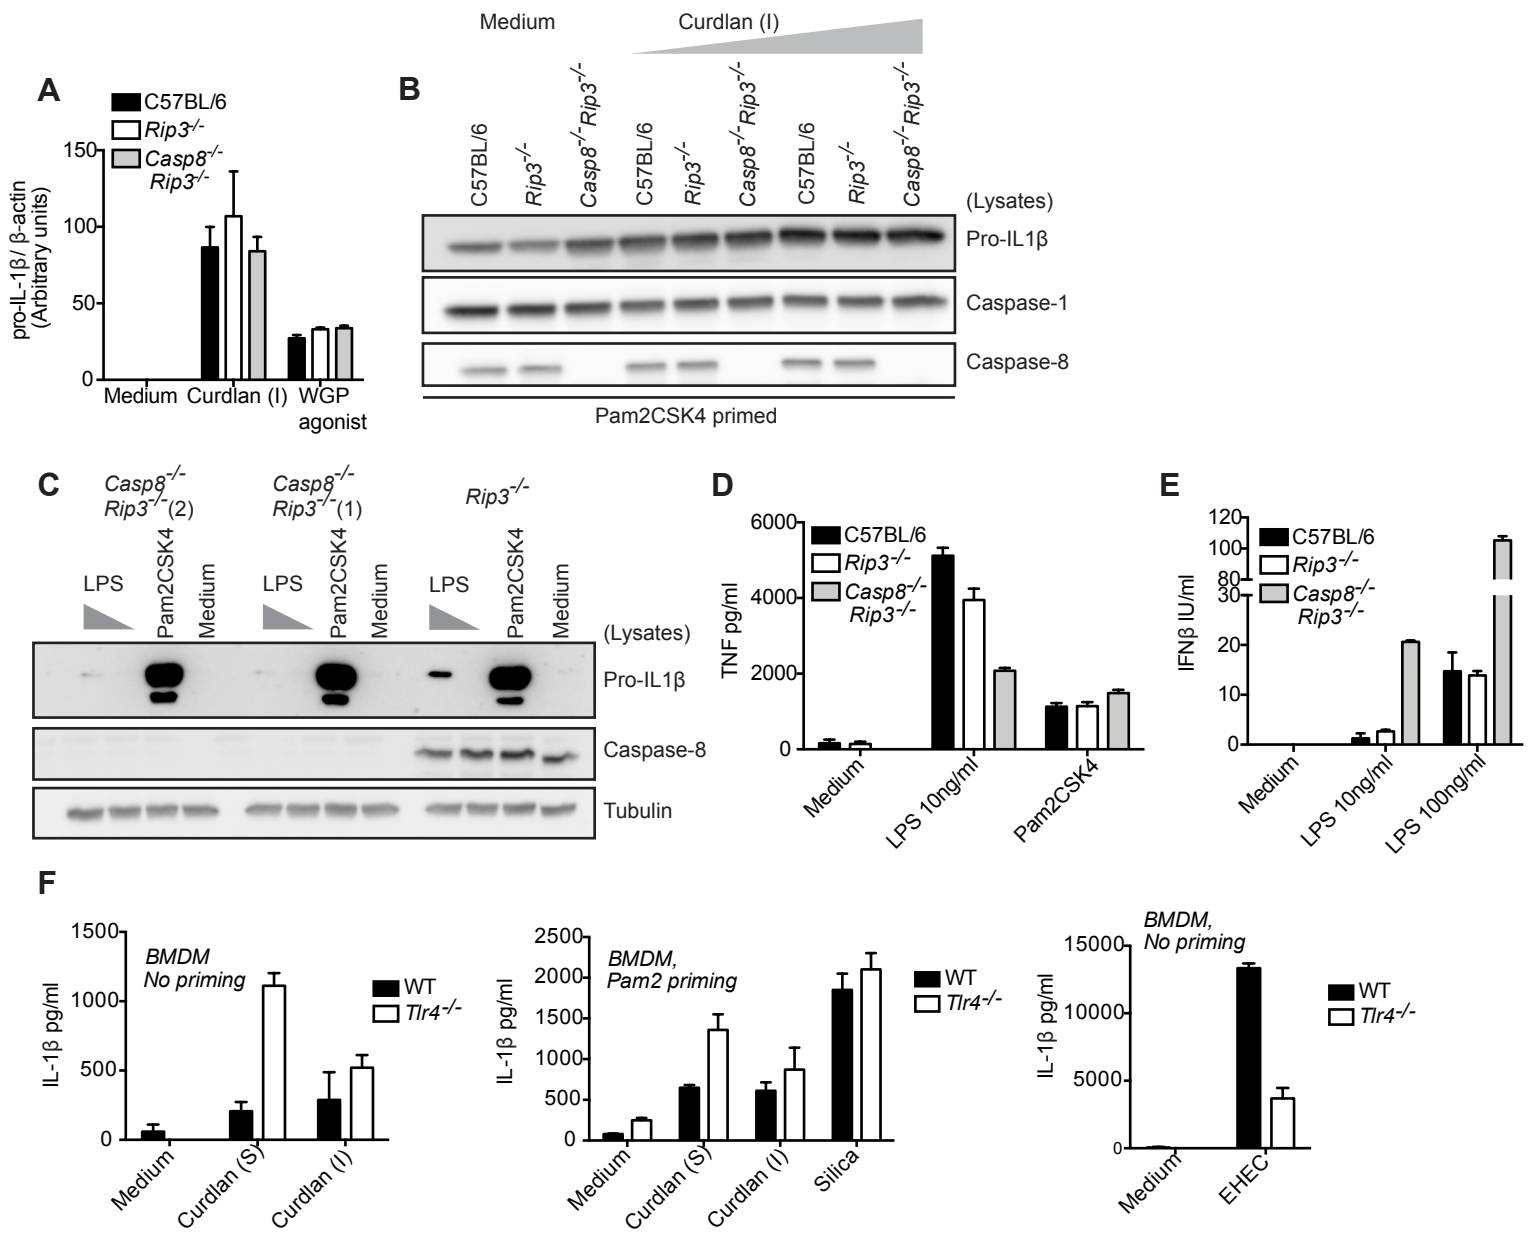

**Figure S3. Role of caspase-8 in TLR signaling does not affect  $\beta$ -glucan induced IL-1 $\beta$ .** Unprimed BMDC from C57BL/6, *Rip3*<sup>-/-</sup>, *Casp8*<sup>-/-</sup>*Rip3*<sup>-/-</sup> mice were stimulated with  $\beta$ -glucan ligands for 4h and pro-IL1 $\beta$  mRNA levels was measured by qRT-PCR (A). Pam2CSK4 primed cells were stimulated with the indicated ligands for 6h and cell lysates were probed for IL-1 $\beta$ , caspase-1 and caspase-8 (B). Unprimed BMDC were stimulated with LPS, Pam2CSK4 for 6h, pro-IL-1 $\beta$ , caspase-8 and tubulin were detected in the cell lysates by western blotting (C), TNF and IFN $\beta$  released in the supernatants was measured by ELISA (D, E). Unprimed or Pam2CSK4 primed BMDM from WT or *Tlr4*<sup>-/-</sup> mice were stimulated with the indicated ligands for 24h and IL-1 $\beta$  levels were measured in the supernatants by ELISA (F).

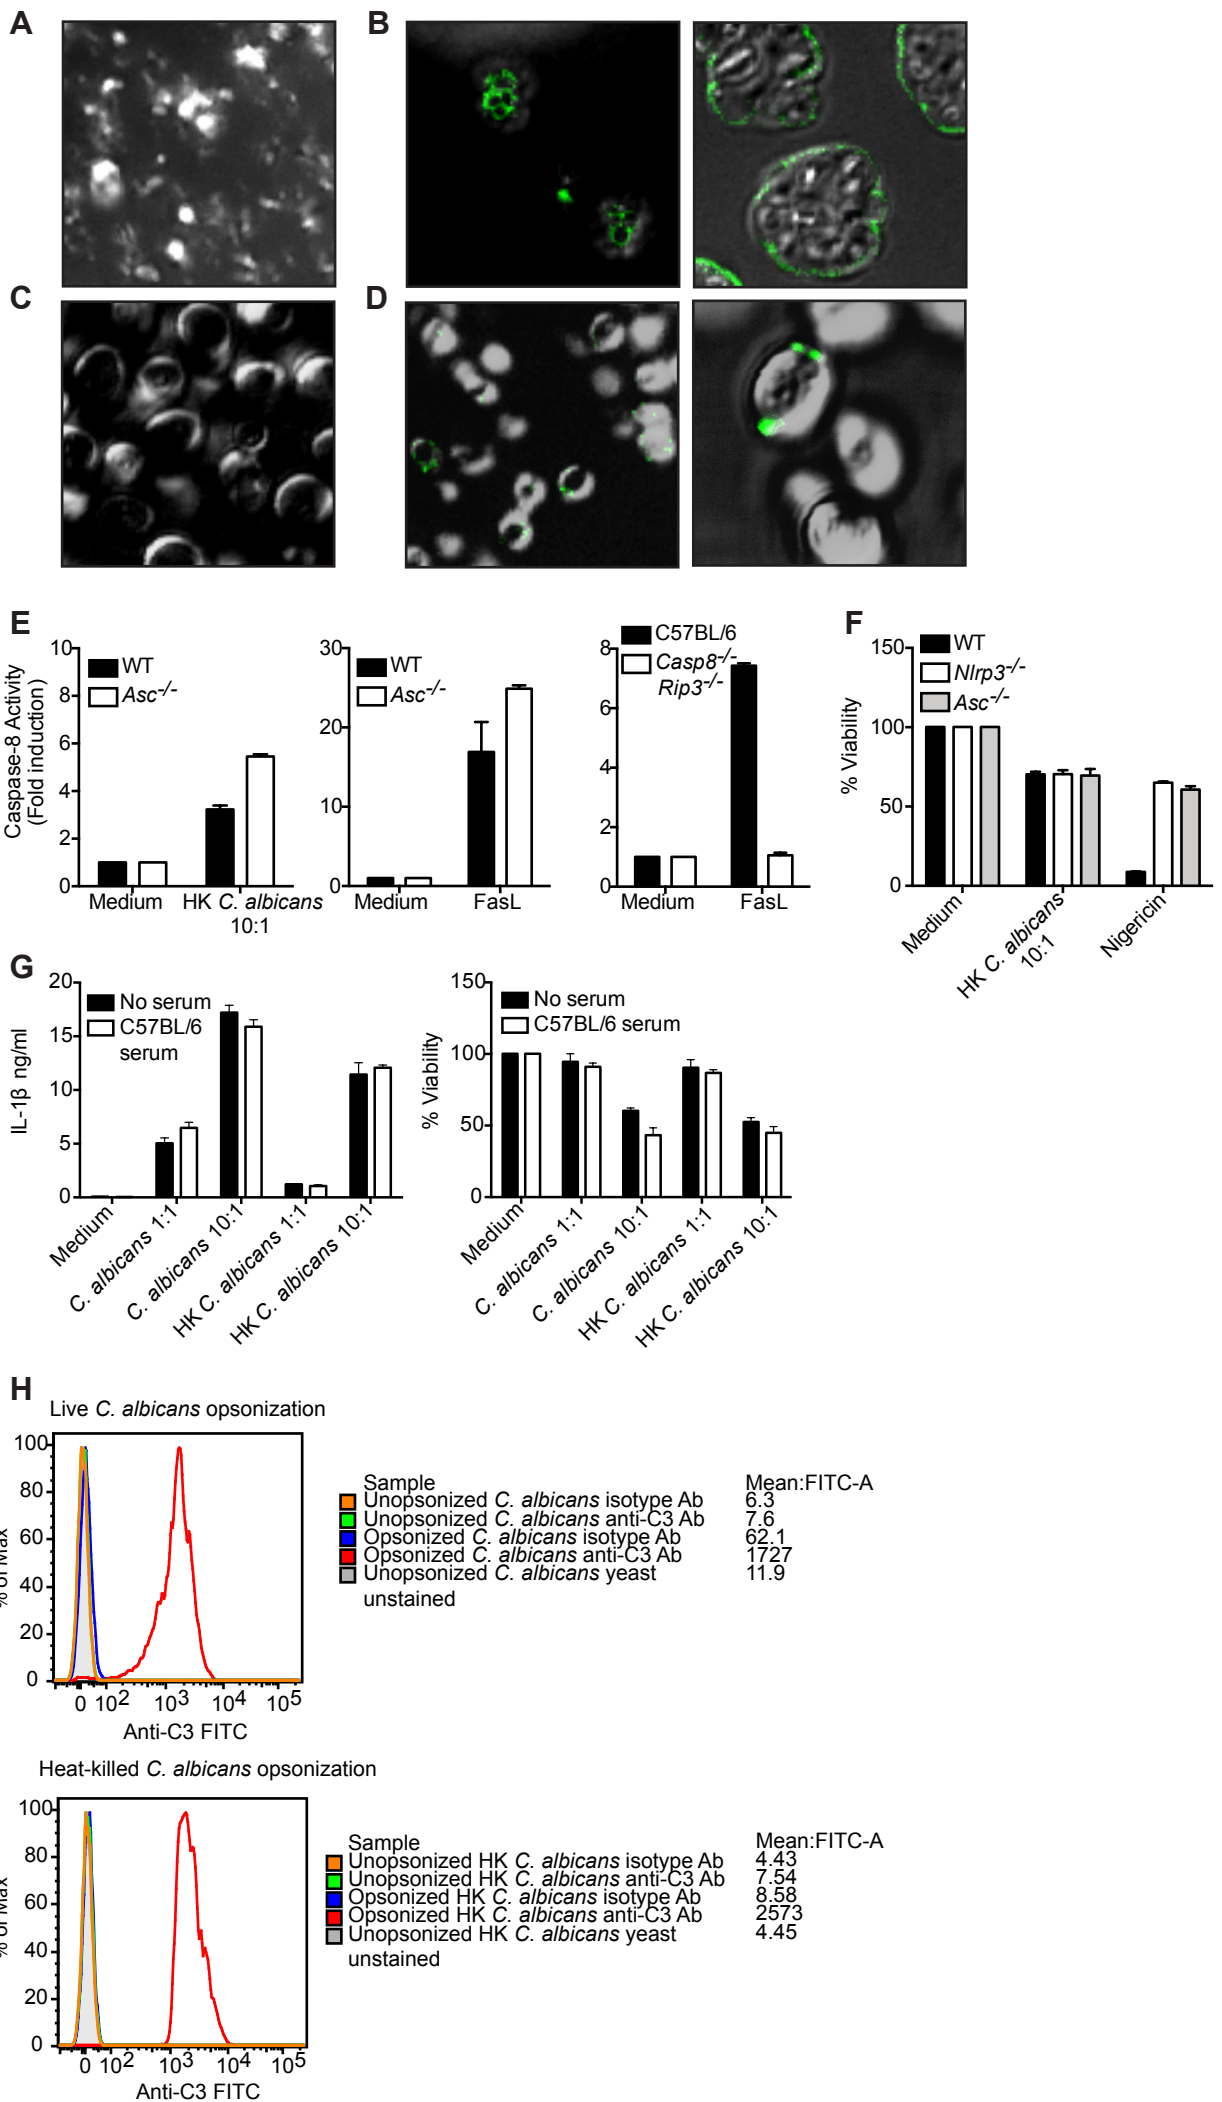

**Figure S4. HK *C. albicans* exhibits  $\beta$ -glucan staining, triggers NLRP3 inflammasome-independent caspase-8 activity, cell death and induces IL-1 $\beta$ , cell death in opsonized conditions.** Silica (A), WGP agonist (B), live *C. albicans* (C), HK *C. albicans* (D) were stained with  $\beta$ -glucan antibody and visualized by confocal microscopy. BMDC from C57BL/6, *Casp8*<sup>-/-</sup>*Rip3*<sup>-/-</sup>, *Nlrp3*<sup>-/-</sup> or *Asc*<sup>-/-</sup> mice were stimulated with HK *C. albicans*, FasL for 6h or nigericin for 1h. Caspase-8 activity in the lysates (E) and cell viability (F) were measured. WT BMDC were stimulated with live and HK *C. albicans* which were left untreated or opsonized with the serum of C57BL/6 mice. IL-1 $\beta$  released in the supernatants and cell viability (G) were measured. Opsonized and unopsonized live and HK *C. albicans* were stained with anti-C3 antibody and the C3 deposition was analysed by flow cytometry (H).
